# Supplementary material for: Hydrothermal encapsulation of VO2(A) nanorods in amorphous carbon by carbonization of glucose for energy storage devices
Source: Royal Society of Chemistry journal article supplement (doi:10.1039/c7dt03853d), 2017-11-21
Supplement: c7dt03853d1.pdf [file c7dt03853d1.pdf]

**Electronic supplementary information**

for

**Hydrothermally encapsulating VO<sub>2</sub>(A) nanorods into amorphous carbon by the  
carbonization of glucose as energy storage device**

by

Jiqi Zheng, Yifu Zhang\*, Qiushi Wang, Hanmei Jiang, Yanyan Liu, Tianming Lv, Changgong Meng

### Synthesis of pure VO<sub>2</sub>(A) nanomaterials

VO<sub>2</sub>(A) nanomaterials was synthesized according to the previous report (*Solid State Commun.*, **2012**, 152, 253) and modified. In a typical run, 1.82 g commercial V<sub>2</sub>O<sub>5</sub> was dispersed into the mixture of 60 mL H<sub>2</sub>O and 10 mL ethanol under magnetic stirring at a room temperature for 30 min. The solution was transferred into a 100 mL Teflon Lined stainless steel autoclave, which was sealed and maintained at 180 °C for 96 h. The as-synthesized sample was filtered off and washed several times with deionized water and ethanol, respectively, and then dried in vacuum for use. Then 0.71 g of the as-obtained sample VO<sub>2</sub>(B) was dispersed into 60 mL H<sub>2</sub>O and transferred to a 100 mL Teflon Lined stainless steel autoclave, which was heated at 220 °C for 12 days. The as-synthesized sample was filtered off and washed several times with deionized water and ethanol, respectively, and then dried in vacuum at 75 °C. XRD pattern (Fig. S1) revealed that pure-phase VO<sub>2</sub>(A) was synthesized.

### Synthesis of carbon spheres

The carbon spheres were synthesized by a hydrothermal method (*Angew. Chem. Int. Ed.*, **2014**, 43, 597). 1M aqueous glucose solution was transferred into a 50 mL Teflon Lined stainless steel autoclave, which was heated at 180 °C for 4 h. After washing with deionized water and ethanol and drying, the sample was then annealed in Ar at 700 °C for 2 h.

**Fig. S1**

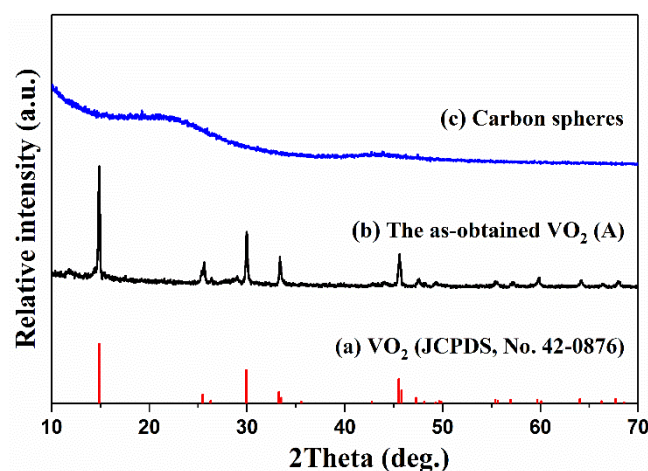

Fig. S1. XRD patterns of the as-obtained VO<sub>2</sub>(A) and carbon spheres.

Fig. S2

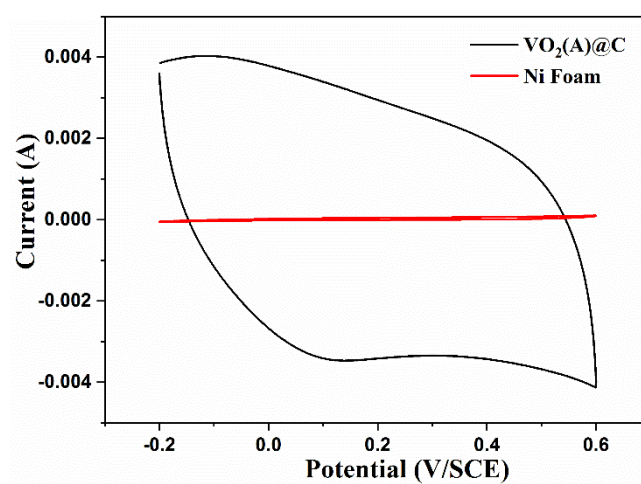

Fig. S2. CV curves of  $\text{VO}_2(\text{A})@\text{C}$  composites and Ni foam collected at a scan rate of  $20 \text{ mV} \cdot \text{s}^{-1}$ .

Fig. S3

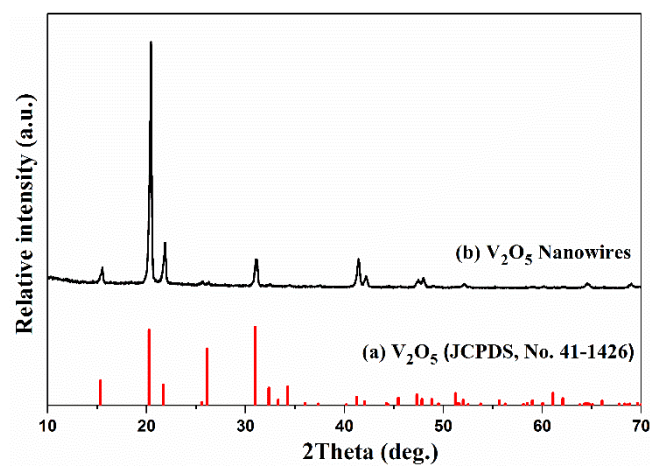

Fig. S3. XRD patterns of the synthesized  $\text{V}_2\text{O}_5$  nanowires.

**Fig. S4**

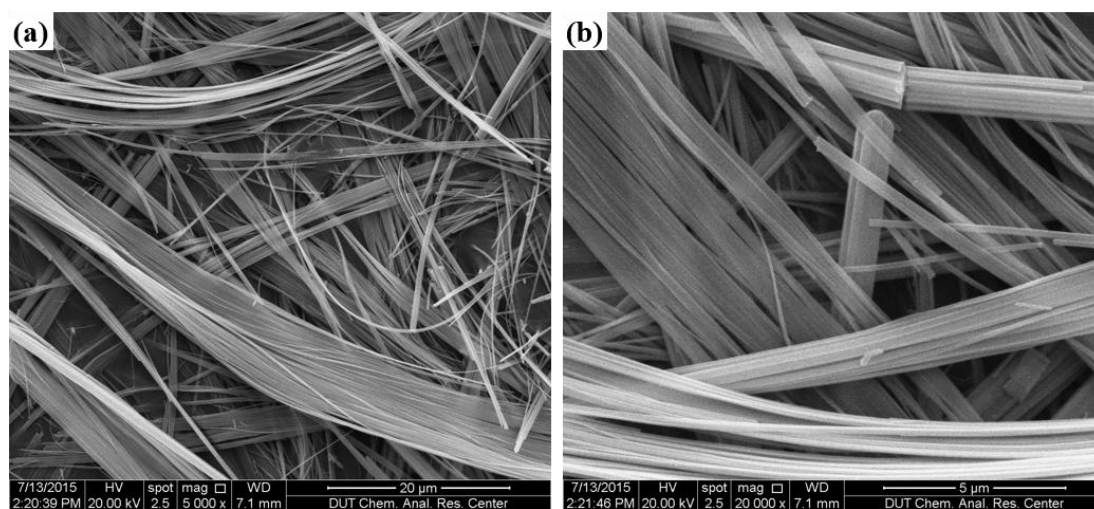

Fig. S4. SEM images of the synthesized  $\text{V}_2\text{O}_5$  nanowires.

**Fig. S5**

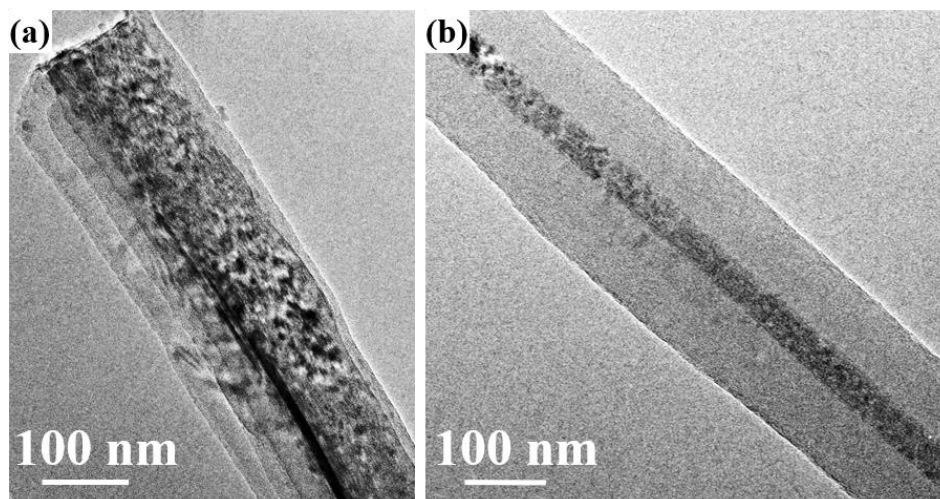

Fig. S5. TEM images of  $\text{VO}_2(\text{A})@\text{C}$  composites synthesized with different amount of glucose: (a) 1 g;  
(b) 2 g.

Fig. S6

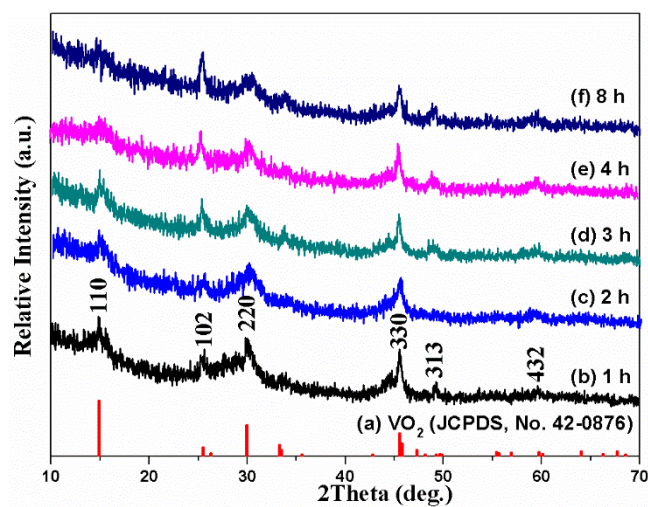

Fig. S6. XRD patterns of the products synthesized with different reaction times.

Fig. S7

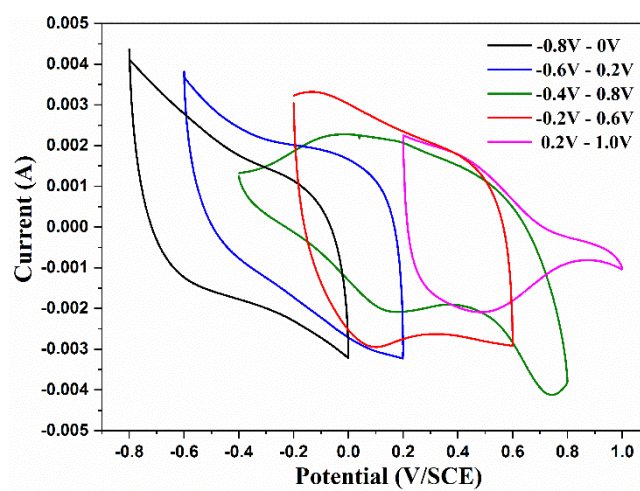

Fig. S7. CV curves of VO<sub>2</sub>(A)@C composites on various potential limits collected at a scan rate of 20 mV·s<sup>-1</sup>.

**Fig. S8**

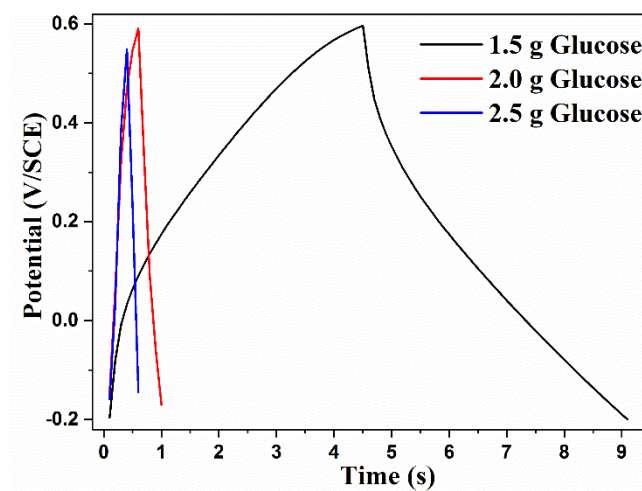

Fig. S8. Galvanostatic charge-discharge curves of VO<sub>2</sub>(A)@C composites synthesized with different amount of glucose collected at a current density of 1 A·g<sup>-1</sup>.

**Fig. S9**

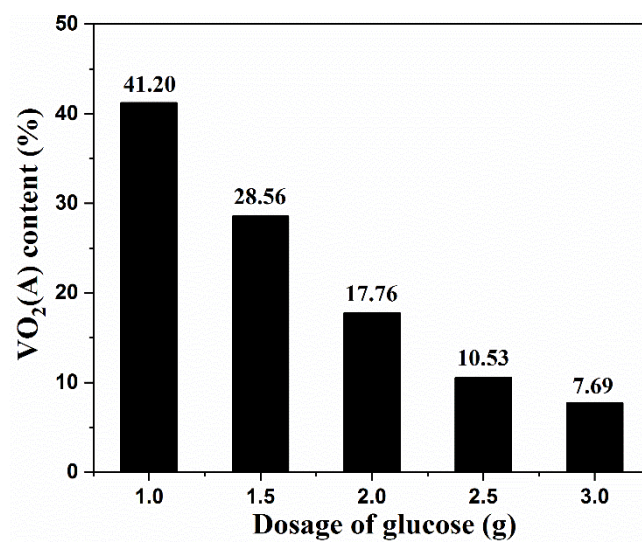

Fig. S9. VO<sub>2</sub> contents of the VO<sub>2</sub>(A)@C core-shell composites synthesized with 1 g, 1.5 g, 2 g, 2.5g and 3 g glucose.

Fig. S10

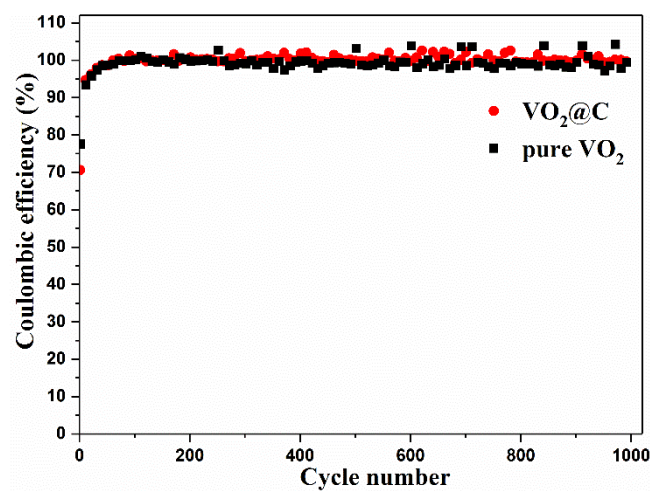

Fig. S10. The coulombic efficiency of  $\text{VO}_2(\text{A})@\text{C}$  composites and pure  $\text{VO}_2(\text{A})$  calculated based on the GCD curves (Fig. 4f).

Fig. S11

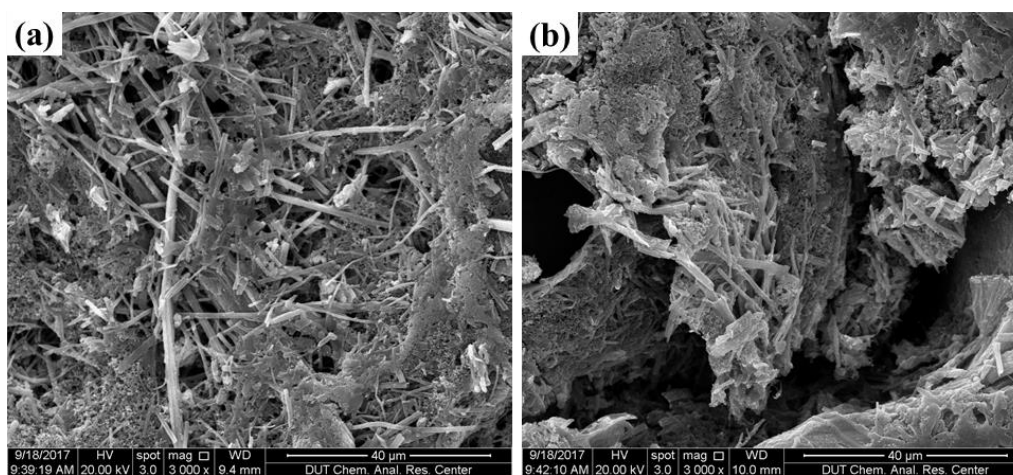

Fig. S11. SEM images of the working electrodes before (a) and after (b) the cycles in  $\text{Na}_2\text{SO}_4$  aqueous solution.



Fig. S12

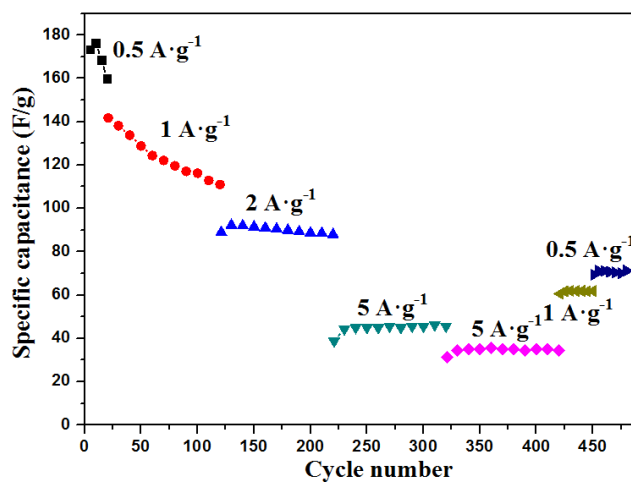

Fig. S12. Cycling performance of  $\text{VO}_2(\text{A})@\text{C}$  composites collected at various current densities.

Fig. S13

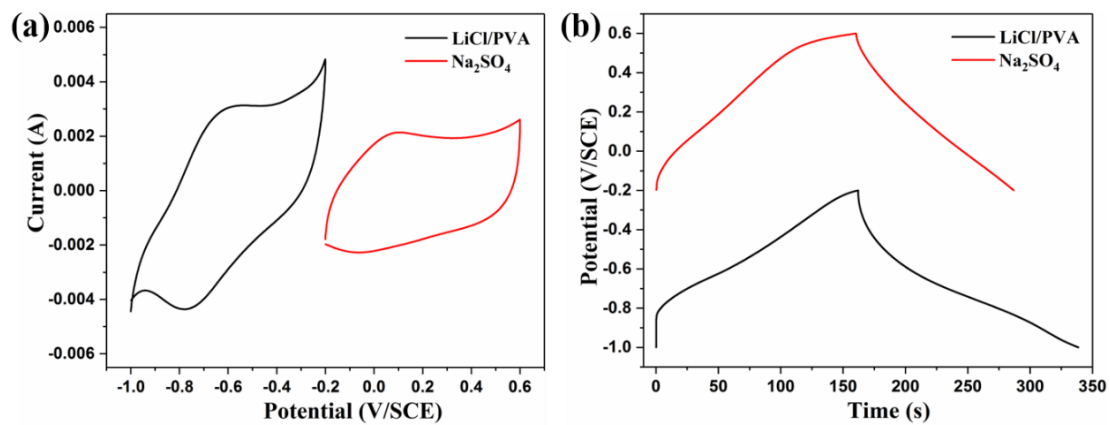

Fig. S13. CV curves collected at a scan rate of  $20 \text{ mV} \cdot \text{s}^{-1}$  (a) and GCD curves collected at a current density of  $1 \text{ A} \cdot \text{g}^{-1}$  (b) of  $\text{VO}_2(\text{A})@\text{C}$  composites in  $0.5 \text{ M Na}_2\text{SO}_4$  aqueous electrolyte and LiCl/PVA gel electrolyte.



Fig. S14

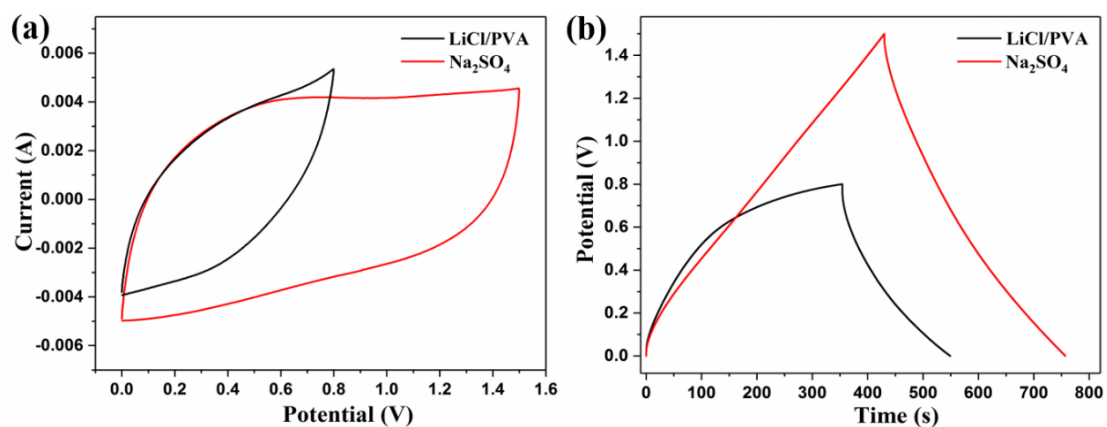

Fig. S14. CV curves collected at a scan rate of  $20 \text{ mV} \cdot \text{s}^{-1}$  (a) and GCD curves collected at a current density of  $1 \text{ A} \cdot \text{g}^{-1}$  (b) of the AC//VO<sub>2</sub>(A)@C device in 0.5 M Na<sub>2</sub>SO<sub>4</sub> aqueous electrolyte and

Fig. S15

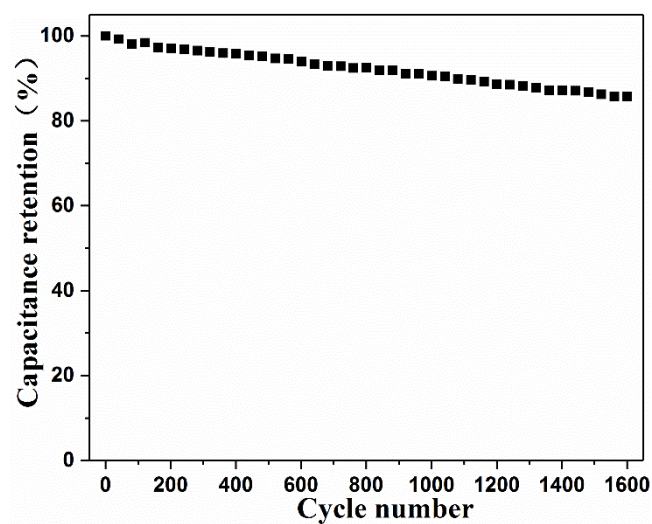

Fig. 15. Cycling performance of AC//VO<sub>2</sub>(A)@C ASC device collected at a scan rate of  $50 \text{ mV s}^{-1}$  for 1600 cycles in LiCl/PVA gel electrolyte.

**Table S1****Table 1.** Comparison of the electrochemical performance of supercapacitor devices.

| Types of device                                                 | Electrolyte                           | Specific capacitance<br>/F·cm <sup>-2</sup> | Cyclic performance                 | Reference |
|-----------------------------------------------------------------|---------------------------------------|---------------------------------------------|------------------------------------|-----------|
| VO <sub>2</sub> (A)//AC ASCs                                    | 0.5 M Na <sub>2</sub> SO <sub>4</sub> | 0.50, 5 mV·s <sup>-1</sup>                  | 34.6% retention after 1000 cycles  | This work |
| VO <sub>2</sub> (A)//AC ASCs                                    | 5 M LiCl/PVA                          | 0.22, 20 mV·s <sup>-1</sup>                 | 90.3% retention after 1000 cycles  | This work |
| V <sub>2</sub> O <sub>5</sub> SSCs                              | 1 M LiClO <sub>4</sub> /PVA           | 0.38, 1 mV·s <sup>-1</sup>                  | 88% retention after 1000 cycles    | [1]       |
| PET/Pt/MnO <sub>2</sub> SSCs                                    | H <sub>3</sub> PO <sub>4</sub> /PVA   | 0.2, 10 mV·s <sup>-1</sup>                  | 82.2% retention after 10000 cycles | [2]       |
| WO <sub>3-x</sub> /MoO <sub>3-x</sub> //PANI/carbon fabric ASCs | H <sub>3</sub> PO <sub>4</sub> /PVA   | 0.216, 2 mA·cm <sup>-1</sup>                | 75% retention after 10000 cycles   | [3]       |
| PPy@MnO <sub>2</sub> @rGO SSCs                                  | H <sub>3</sub> PO <sub>4</sub> /PVA   | 0.41, 0.1 mA·cm <sup>-3</sup>               | 92% retention after 4950 cycles    | [4]       |
| NiCo <sub>2</sub> O <sub>4</sub> SSCs                           | KOH/PVA                               | 0.16, 1 mA·cm <sup>-2</sup>                 | 100% after 3000 cycles             | [5]       |
| SWNT-MnO <sub>2</sub> SSCs                                      | 2 M Li <sub>2</sub> SO <sub>4</sub>   | 0.41                                        | 100% retention after 35000 cycles  | [6]       |

ASCs = Asymmetric Supercapacitors; SSCs = Symmetric Supercapacitors; M = mol L<sup>-1</sup>; PVA = Polyvinyl Alcohol

[1] B. Pandit, D.P. Dubal, B.R. Sankapal, *Electrochimica Acta*, 242 (2017) 382-389.

[2] X. Long, Z.G. Zeng, E.J. Guo, X.B. Shi, H.J. Zhou, X.H. Wang, *Journal of Power Sources*, 325 (2016) 264-272.

[3] X. Xiao, T.P. Ding, L.Y. Yuan, Y.Q. Shen, Q. Zhong, X.H. Zhang, Y.Z. Cao, B. Hu, T. Zhai, L. Gong, J. Chen, Y.X. Tong, J. Zhou, Z.L. Wang, *Advanced Energy Materials*, 2 (2012) 1328-1332.

[4] Y. Huang, H. Hu, Y. Huang, M.S. Zhu, W.J. Meng, C. Liu, Z.X. Pei, C.L. Hao, Z.K. Wang, C.Y. Zhi, *ACS Nano*, 9 (2015) 4766-4775.

[5] Q. Wang, X. Wang, B. Liu, G. Yu, X. Hou, D. Chen, G. Shen, *Journal of Materials Chemistry A*, 1 (2013) 2468-2473.

[6] L.B. Hu, M. Pasta, F. La Mantia, L.F. Cui, S. Jeong, H.D. Deshazer, J.W. Choi, S.M. Han, Y. Cui, *Nano Letters*, 10 (2010) 708-714.
